# Supplementary material for: Lung MRI and impairment of diaphragmatic function in Pompe disease
Source: PubMed Central journal article supplement (PMC4428089; doi:10.1186/s12890-015-0058-3), 2015-05-06

# Volunteers

## Inspiration

## Expiration

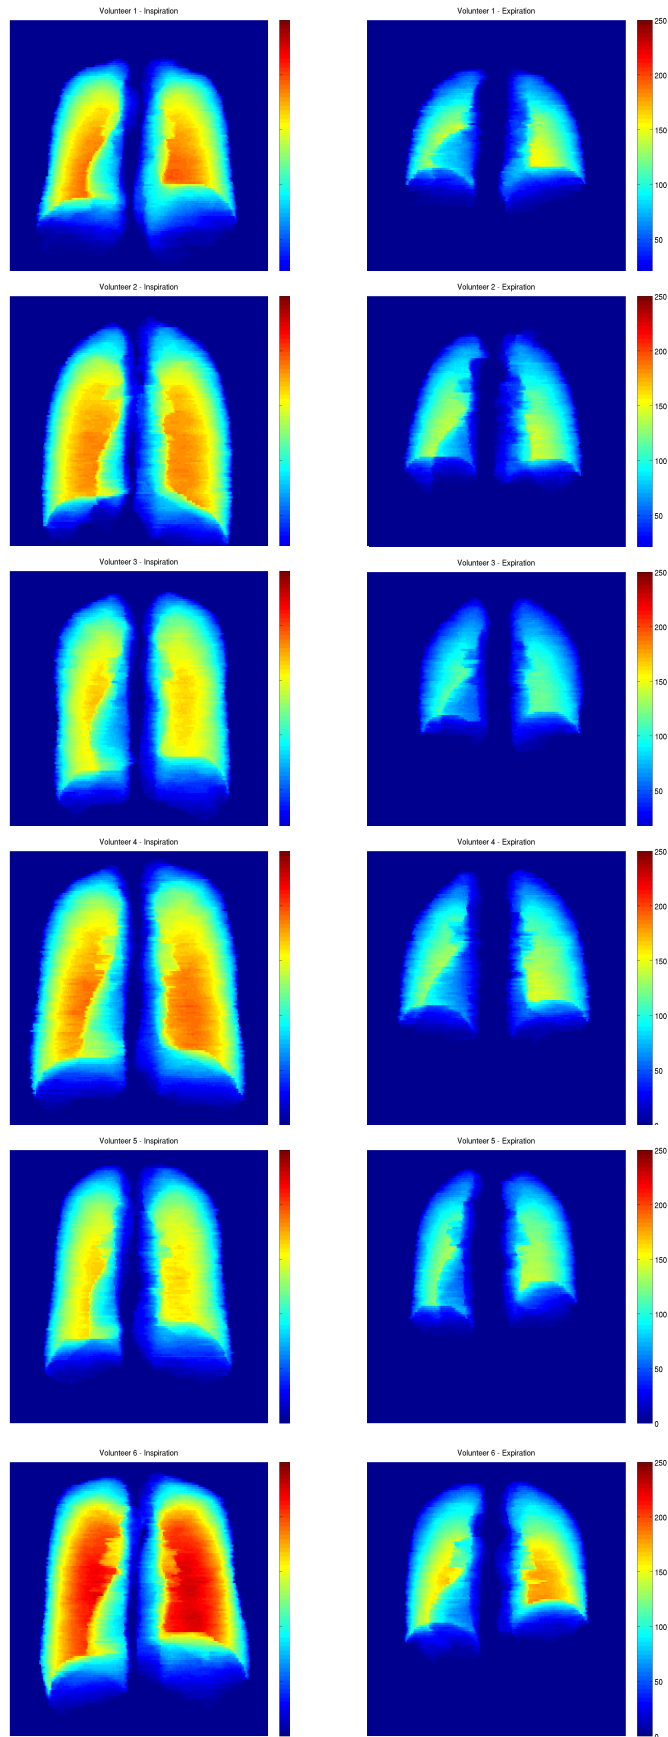

# Pompe patients

## Inspiration

## Expiration

## Inspiration

## Expiration

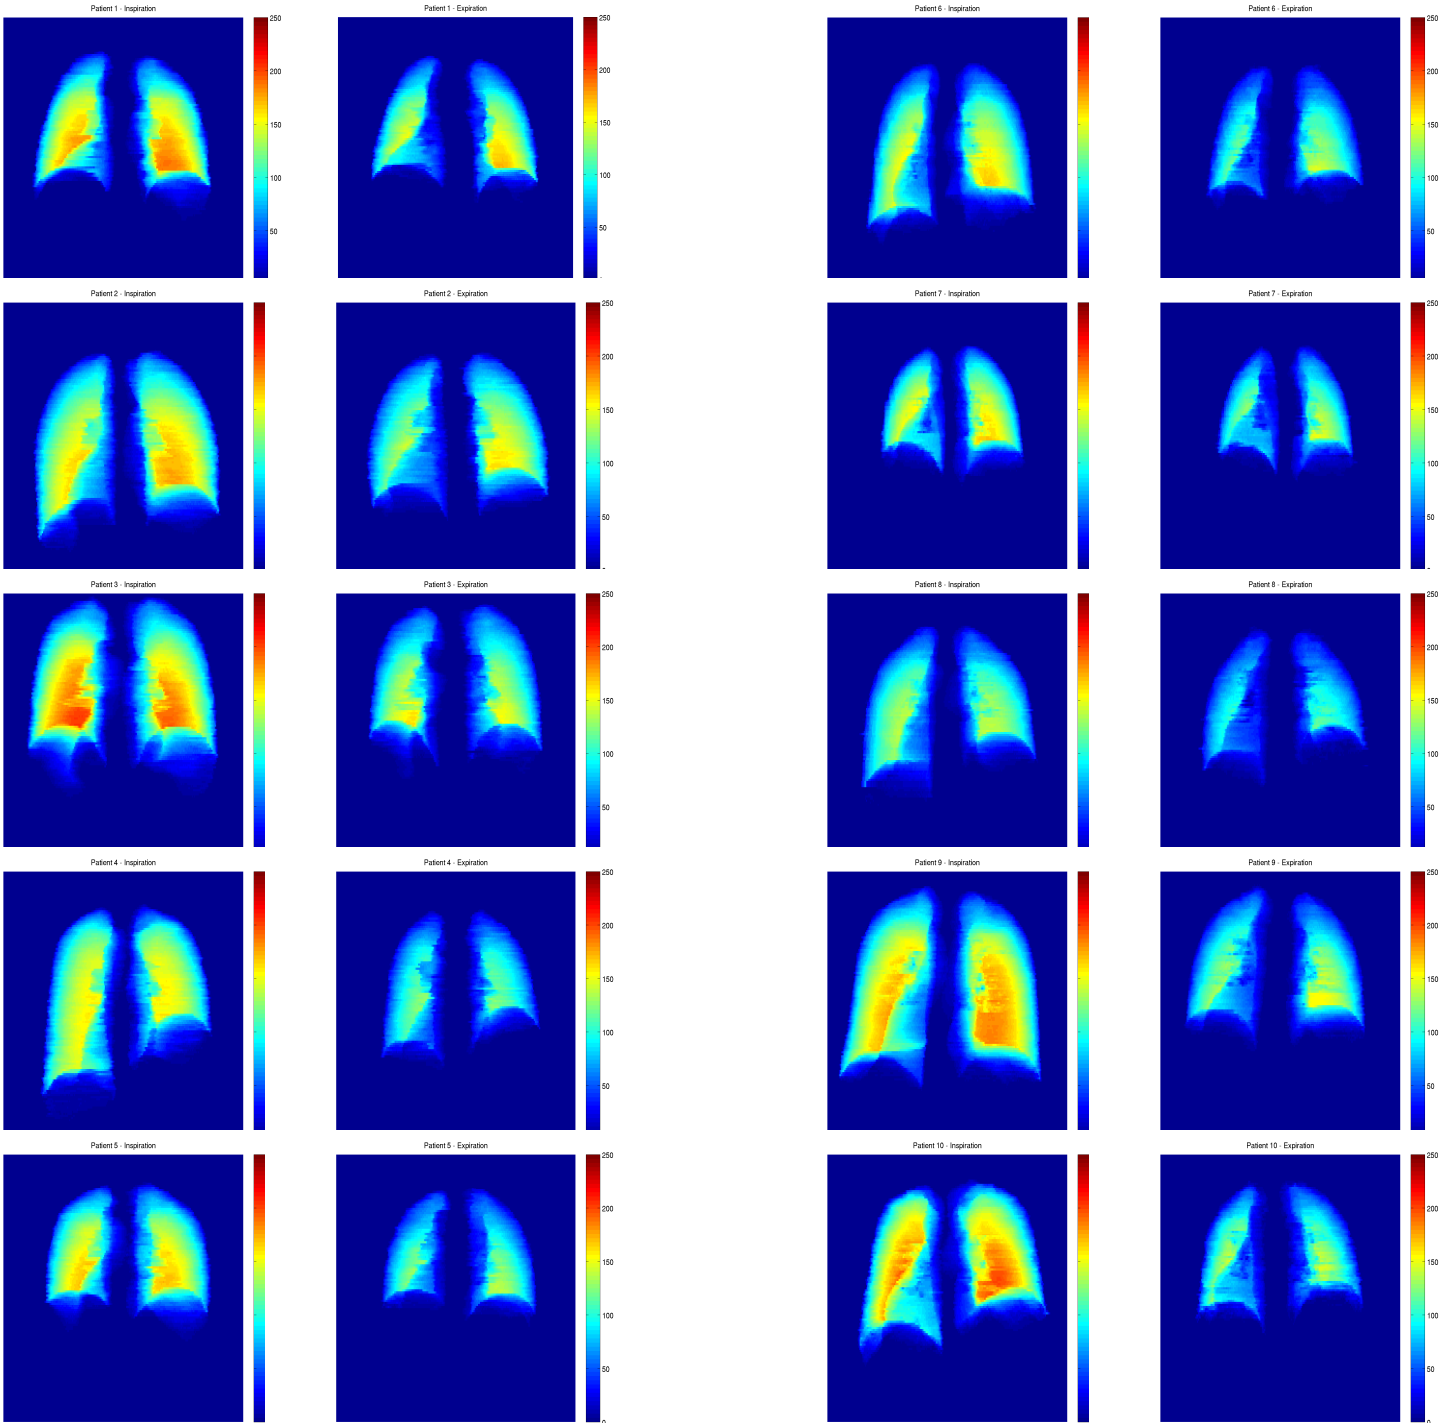

Supplement: 12890_2015_58_MOESM1_ESM.pdf [file 12890_2015_58_MOESM1_ESM.pdf]
